# Supplementary material for: FMO1 Is Involved in Excess Light Stress-Induced Signal Transduction and Cell Death Signaling
Source: PubMed Central journal article supplement (PMC7600522; doi:10.3390/cells9102163), 2020-09-24
Supplement: cells-09-02163-s001.pdf [file cells-09-02163-s001.pdf]

## Supplementary Data

# FMO1 is involved in excess light stress-induced signal transduction and cell death signaling

Weronika Czarnocka <sup>1,2\*</sup>, Yosef Fichman <sup>3</sup>, Maciej Bernacki <sup>2,4</sup>, Elżbieta Różańska <sup>1</sup>, Izabela Sańko-Sawczenko <sup>1</sup>, Ron Mittler <sup>3,5</sup> and Stanisław Karpiński <sup>2</sup>

<sup>1</sup> Department of Botany, Institute of Biology, Warsaw University of Life Sciences, Nowoursynowska 159, 02-776 Warsaw, Poland

<sup>2</sup> Department of Plant Genetics, Breeding and Biotechnology, Institute of Biology, Warsaw University of Life Sciences, Nowoursynowska 159, 02-776 Warsaw, Poland

<sup>3</sup> The Division of Plant Sciences and Interdisciplinary Plant Group, College of Agriculture, Food and Natural Resources, Christopher S. Bond Life Sciences Center University of Missouri, Columbia, MO, USA

<sup>4</sup> Institute Of Technology And Life Sciences, Falenty, Al. Hrabaska 3, 05-090 Raszyn, Poland

<sup>5</sup> Department of Surgery, University of Missouri School of Medicine, Columbia, MO, USA

\* Correspondence: weronika\_czarnocka@sggw.edu.pl

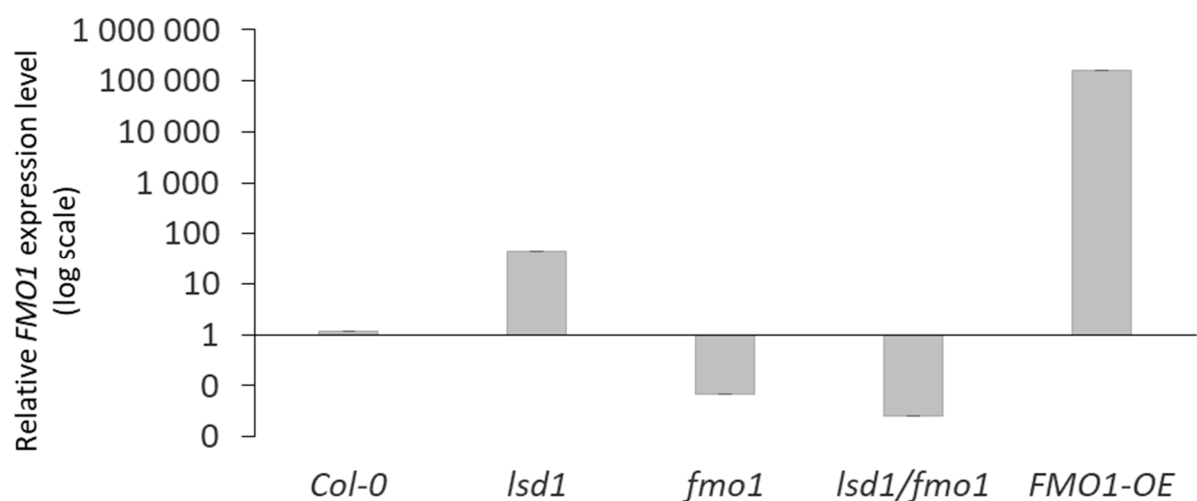

**Supplementary Fig. 1.** Relative *FMO1* expression level in the wild type (Col-0), *lsd1*, *fmo1*, *lsd1/fmo1* mutants and the line overexpressing *FMO1* (FMO1-OE).

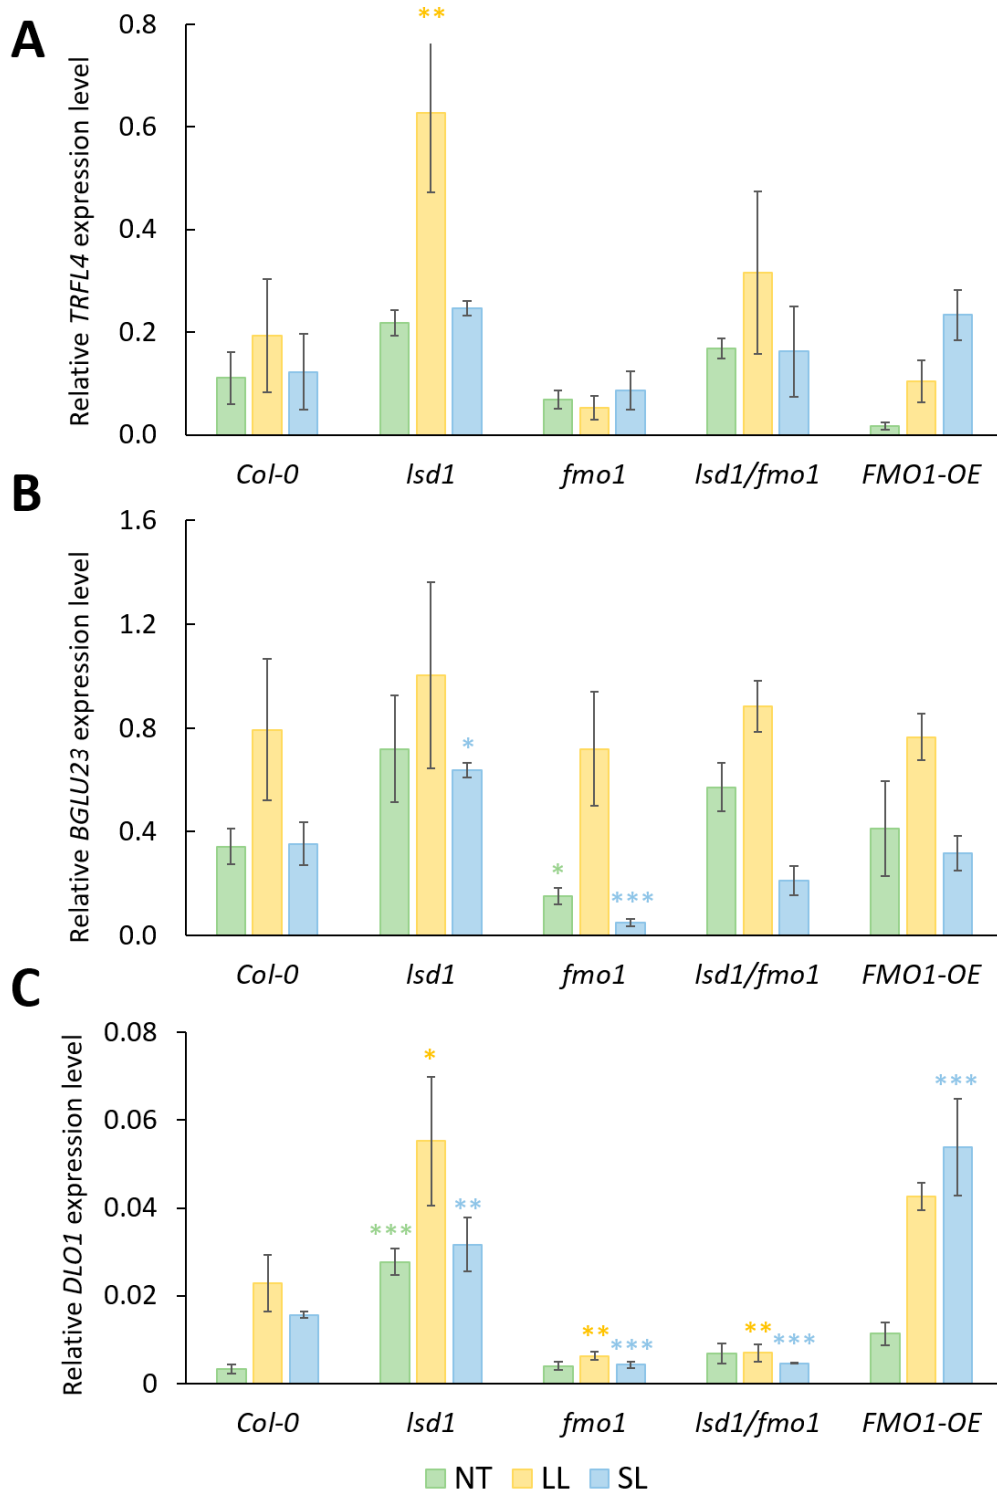

**Supplementary Fig. 2.** Relative expression of different ROS forms markers, *TRFL4* ( $^1\text{O}_2$ ), *BGLU23* ( $\text{O}_2^-$ ) and *DLO1* ( $\text{H}_2\text{O}_2$ ) in the wild type (*Col-0*), *lsd1*, *fmo1*, *lsd1/fmo1* mutants and the line overexpressing FMO1 (*FMO1-OE*), performed for non-treated (NT) leaves, local leaves exposed to EL stress (LL) and systemic leaves (SL). Values  $\pm$  SD are averages for 5 independent biological replicates, for which qPCRs were performed in duplicate ( $n=10$ ). Stars above the bars indicate statistically significant difference, in comparison to the wild-type, according to the t-test at a level of  $P < 0.05$  (\*),  $P < 0.005$  (\*\*) or  $P < 0.001$  (\*\*\*).

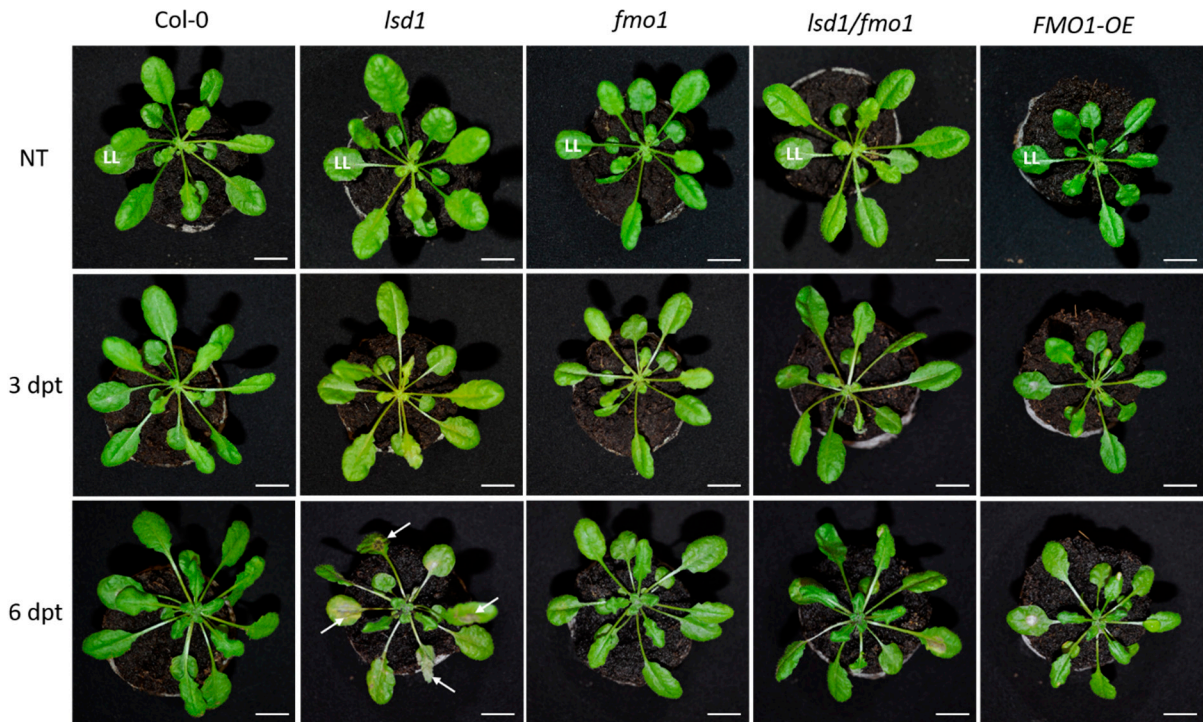

**Supplementary Fig. 3.** Rosette morphology of the wild type (Col-0), *lsd1*, *fmo1*, *lsd1/fmo1* mutants and FMO1-OE line before, 3 and 6 days post EL treatment.

**Supplementary Table 1.** Primers used for FMO1 cloning and qPCR.

| Gene name    | AGI code  | Forward primer                                       | Reverse primer                                           | Application |
|--------------|-----------|------------------------------------------------------|----------------------------------------------------------|-------------|
| FMO1         | AT1G19250 | GGGGACAAGTTTGTACAAAAAAGCAG<br>GCTCCATGCTTCTAACTATGAT | GGGGACCACCTTTGTACAAGAAAGCTGG<br>GCTTTAAGCAGTCATATCTTCTTT | cloning     |
| PP2AA2 (Ref) | AT3G25800 | TGCAATGGTTACAAGACAAGGTT                              | GCATTGCCCATTCAGGAC                                       | qPCR        |
| 5-FCL (Ref)  | AT5G13050 | GCAAACCTCAATGAACATTTTGG                              | GATCGGTTTCATCTGCTTGC                                     | qPCR        |
| FMO1         | AT1G19250 | TGATGTTGTGATACTTGCTACTGGT                            | GGATGGATTGTTCCCTGTA                                      | qPCR        |
| TRFL4        | AT3G53790 | CATTTAACCATGTAAATCATCGTACC                           | CTCTCCTTGCCTTGCTGA                                       | qPCR        |
| BGLU23       | AT3G09260 | AACACAGACGCCTTTAGAATGTC                              | GAATTGCACACCAGCTTGAC                                     | qPCR        |
| DLO1         | AT4G10500 | CCCAACCGTTATCACTGTCC                                 | AGCGACCCATTTATCATCCTT                                    | qPCR        |
| APX2         | AT3G09640 | TCATCCTGGTAGACTGGACAAA                               | CACATCTCTTAGATGATCCACACC                                 | qPCR        |
| ZAT10        | AT1G27730 | CCTACCACTTGTCACGCAAC                                 | CTGAAGAAGAAGTAATGAAAGTGTGTG                              | qPCR        |
